# Supplementary material for: Decreasing Abundance, Increasing Diversity and Changing Structure of the Wild Bee Community (Hymenoptera: Anthophila) along an Urbanization Gradient
Source: PLOS journal article supplement (doi:10.1371/journal.pone.0104679), 2014-08-13
Supplement: S4 (10.1371/journal.pone.0104679.s004) [file journal.pone.0104679.s004]

**Table S3: Significant correlation between landscape variables.**

Radius = 500 m

|                             | Impervious surface | Agricultural land | Wooded area | Open area | Connectivity of wooded area |
|-----------------------------|--------------------|-------------------|-------------|-----------|-----------------------------|
| Agricultural land           | -0.75              |                   |             |           |                             |
| Wooded area                 | -0.45              | -                 |             |           |                             |
| Open area                   | -                  | -                 | -           |           |                             |
| Connectivity of wooded area | -                  | -                 | 0.74        | -         |                             |
| Connectivity of open area   | -                  | -                 | -           | -         | -                           |

Radius = 1 000 m

|                             | Impervious surface | Agricultural land | Wooded area | Open area | Connectivity of wooded area |
|-----------------------------|--------------------|-------------------|-------------|-----------|-----------------------------|
| Agricultural land           | -0.81              |                   |             |           |                             |
| Wooded area                 | -0.5               | -                 |             |           |                             |
| Open area                   | -                  | -                 | -           |           |                             |
| Connectivity of wooded area | -                  | -                 | 0.64        | -         |                             |
| Connectivity of open area   | -                  | -                 | -           |           |                             |

Radius = 2 000 m

|                             | Impervious surface | Agricultural land | Wooded area | Open area | Connectivity of wooded area |
|-----------------------------|--------------------|-------------------|-------------|-----------|-----------------------------|
| Agricultural land           | -0.82              |                   |             |           |                             |
| Wooded area                 | -0.47              | -                 |             |           |                             |
| Open area                   | -                  | -                 | -           |           |                             |
| Connectivity of wooded area | -                  | -                 | 0.5         | -         |                             |
| Connectivity of open area   | -                  | -                 | -           | 0.71      | -                           |
